# Supplementary material for: Concurrent Drought Stress and Vascular Pathogen Infection Induce Common and Distinct Transcriptomic Responses in Chickpea
Source: Front Plant Sci. 2017 Mar 14;8:333. doi: 10.3389/fpls.2017.00333 (PMC5361651; doi:10.3389/fpls.2017.00333)
Supplement: Supplementary file 7 [file Data_Sheet_3.XLSX]

## Sheet: SD-pathogen
Supplementary file S3. List of differentially expressed genes involved in cell wall modification in SD-pathogen stress treatment
		Fold change value
Gene ID	Gene name	Rep1	Rep 2	Average	p-value	FDR
TC23862	Pectinesterase inhibitor 12	1.64814	1.45715	1.55265	0.0402465	0.045996
TC14199	Chalcone synthase	1.99147	1.64798	1.81973	0.035591	0.0442851
TC33748	Beta glucosidase 32	3.02915	3.15801	3.09358	0.00546252	0.0315973
TC27171	Glycosyl hydrolase family 47	2.86378	2.15899	2.51138	0.0333843	0.0442851
TC23779	Beta glucosidase 12	1.3862	1.52928	1.45774	0.0276178	0.0442851
TC09139	Peroxidase superfamily protein	1.20648	1.40762	1.30705	0.0126302	0.0442851
TC03683	Beta-xylosidase 2	1.17519	0.987011	1.0811	0.0449041	0.0468565
TC33014	Anthocyanidin glucosyltransferase	1.58963	1.58294	1.58629	0.00542574	0.0315973
TC08406	UDP-glucosyltransferase	1.27358	1.59252	1.43305	0.0307499	0.0442851
TC15629	Glycogenin-like starch initiation 5	-1.31427	-0.91891	-1.11659	0.0349347	0.0442851
TC08743	Xyloglucan hydrolase, XTH32	-1.15472	-1.10113	-1.12792	0.00123833	0.0297199
TC29368	Pectin acetylesterase 2-like	-1.33961	-0.974485	-1.15705	0.0242359	0.0442851
TC25586	Pectinesterase inhibitor PPE8B-like	-1.25308	-1.71901	-1.48604	0.0252742	0.0442851
TC12816	Cinnamyl alcohol dehydrogenase 9	-1.42021	-1.25628	-1.33824	0.00454396	0.0315973
TC20949	Cinnamate-4-hydroxylase, C4H	-2.02018	-1.50089	-1.76053	0.0281904	0.0442851
TC16740	4-coumarate:CoA ligase, 4CL	-3.68047	-3.02947	-3.35497	0.0134121	0.0442851
TC03348	Phenylalanine ammonia-lyase 1	-3.3208	-3.60754	-3.46417	0.0429927	0.0468565
TC07773	Galactose-binding protein	-1.16705	-0.89198	-1.02951	0.0216003	0.0442851
TC09268	Glycosyl Hydrolase 9B5	-1.00978	-1.10685	-1.05831	0.0268878	0.0442851
TC14767	Reversibly glycosylated polypeptide 1	-1.809	-1.16061	-1.4848	0.0482625	0.0482625
TC05993	Beta-glucosidase-like 7	-1.62623	-1.87588	-1.75106	0.00658277	0.0315973
TC16233	Glycosyltransferase, UGT72B1	-1.35377	-1.0973	-1.22553	0.0369042	0.0442851
TC05660	Taxadien acetyltransferase	-1.02005	-1.45105	-1.23555	0.0300423	0.0442851
TC19273	Cytochrome P450 81D	-1.69661	-1.32639	-1.5115	0.0274784	0.0442851

## Sheet: SD-drought
Supplementary file S3. List of differentially expressed genes involved in cell wall modification in SD-drought stress treatment
		Fold change value
Gene ID	Gene name	Rep1	Rep 2	Average	p-value	FDR
TC14897	Pectin acetylesterase 10-like	4.23	4.7	4.46	0.00638374	0.0200207
TC02057	Xyloglucan hydrolase, XTH32	2.44	2.21	2.19	0.000500856	0.0065675
TC10544	PARVUS/GLZ1	1.74	1.92	1.92	0.000240639	0.00449193
TC11279	XTH KATAMARI1-like	1.48	1.84	1.86	0.00111205	0.0079708
TC01605	Cellulose synthase, CSLD5	1.42	1.59	1.5	0.00296061	0.012903
TC12200	Galacturonosyltransferase 12	4.17	3.84	4	0.00511691	0.0179092
TC02819	Beta-glucosidase A6	3	2.35	2.16	0.0015219	0.00946959
TC16836	Plant CW/I invertases	1.4	1.46	1.48	0.000650794	0.0065675
TC02479	Beta glucosidase 11	1.74	1.92	1.92	0.000240639	0.00449193
TC11355	Pectate lyase 5	1.32	1.16	1.24	0.00299533	0.012903
TC04588	Galacturonosyltransferase 4	1.29	1.19	1.24	0.00299533	0.012903
TC04329	Peroxidase 42-like	1.07	1.13	1.14	0.00113869	0.0079708
TC28785	Deoxytaxol benzoyltransferase	2.38	2.01	1.97	0.000703661	0.0065675
TC04086	Cytochrome P450 81D	1.1	1.02	1.01	0.000218343	0.00449193
TC11078	Pectinesterase 3-like	-0.990495	-1.11029	-1.05039	0.0482248	0.0493058
TC06310	PARVUS	-0.855062	-1.36037	-1.10772	0.0493058	0.0493058
TC06128	Glycogenin-like starch initiation 3	-1.11194	-1.42257	-1.26726	0.0278021	0.036396
TC04648	Xyloglucan xylosyltransferase 5	-1.60866	-2.21177	-1.91021	0.0384933	0.0439924
TC03997	Xyloglucan xylosyltransferase 2	-2.65836	-2.47866	-2.56851	0.00232231	0.012903
TC09943	Pectinesterase 68	-3.17995	-2.14921	-2.66458	0.0355422	0.0423481
TC14751	XTH-related, XTR23	-2.93729	-3.2717	-3.10449	0.0218961	0.0314406
TC03850	XTH-related, XTR22	-6.92451	-6.28673	-6.60562	0.0114204	0.0278061
TC33764	Chalcone synthase	-1.57287	-1.15949	-1.36618	0.0481524	0.0493058
TC04242	HXXXD-type acyl-transferase	-1.55092	-1.83072	-1.69082	0.00875162	0.0226325
TC12785	Cinnamoyl CoA reductase 1	-1.82704	-1.71363	-1.77033	0.0131421	0.0283061
TC16562	4-coumarate:CoA ligase, 4CL	-2.35325	-2.61235	-2.4828	0.00438317	0.0168713
TC03010	Phenylalanine lyase 1	-3.57395	-2.71775	-3.14585	0.0185548	0.0302705
TC02428	COBRA-like protein 6 precursor	-1.31163	-1.05729	-1.18446	0.0144232	0.0296528
TC06011	Polygalacturonase 2, PG2	-1.08328	-0.918069	-1.00067	0.00679274	0.0200207
TC12398	Glycosyl Hydrolase 9B5	-1.17105	-0.891605	-1.03133	0.0292468	0.036396
TC10795	UDP-glucose 6-dehydrogenase 2	-0.944591	-1.32105	-1.13282	0.0287573	0.036396
TC06673	Powdery mildew resistant 5	-1.29912	-1.28182	-1.29047	0.0377083	0.0439924
TC10459	Arabinogalactan-protein, FLA 11	-1.38386	-1.31227	-1.34807	0.0428004	0.0469965
TC06933	Alpha-Expansin A8	-1.48057	-1.22696	-1.35376	0.018189	0.0302705
TC01766	Exostosin family protein	-1.48389	-1.38893	-1.43641	0.0156664	0.0297618
TC18402	Glycoside Hydrolase Family 16	-1.66902	-1.41934	-1.54418	0.00650897	0.0200207
TC06300	Trichome birefringence-like 43	-1.69097	-1.61643	-1.6537	0.00889135	0.0226325
TC03120	Trichome birefringence-like 10	-1.96088	-1.39093	-1.67591	0.0342327	0.0416745
TC05260	Galacturonosyltransferase 14	-1.83701	-1.72434	-1.78067	0.0148264	0.0296528
TC02780	Beta glucosidase 12	-1.97712	-1.6404	-1.80876	0.0121132	0.0282642
TC02864	Beta-galactosidase 16	-1.93389	-1.70138	-1.81764	0.0229382	0.0321135
TC09084	Peroxidase 63	-1.60057	-2.04712	-1.82385	0.0291205	0.036396
TC03128	Polygalacturonase inhibitor	-1.74489	-2.09464	-1.91976	0.0194607	0.0302705
TC25740	Formin-like protein 18	-1.78033	-2.07112	-1.92573	0.0200002	0.0302705
TC12293	O-methyltransferase 1	-1.44434	-1.93536	-1.68985	0.0207903	0.0306383
TC07628	UDP-D-glucuronate 4-epimerase 2	-1.59975	-2.39558	-1.99766	0.0397626	0.0445342
TC12538	Gluc39 glucanase	-2.39918	-2.06264	-2.23091	0.0160284	0.0297618
TC03292	Alpha-Expansin A10	-2.6995	-1.85782	-2.27866	0.043649	0.0470066
TC05378	Galacturonosyltransferase 9	-2.59427	-2.00955	-2.30191	0.0193078	0.0302705
TC06786	UDP-glucose 6-dehydrogenase 1	-2.34749	-2.54888	-2.44819	0.00830372	0.0226325
TC06273	Arabinogalactan-protein, FLA 12	-2.3772	-3.79412	-3.08566	0.0490337	0.0493058
TC10677	Trichome birefringence-like 38	-3.14979	-2.94939	-3.04959	0.0126503	0.0283061
TC02124	UDP-glucosyltransferase 73C6	-1.37557	-1.10109	-1.23833	0.0274003	0.036396
TC05166	UDP-glucosyl transferase 84B1	-2.28716	-2.06383	-2.1755	0.00451911	0.0168713
TC23900	Isoflavone malonyltransferase	-3.31859	-3.44421	-3.3814	0.019581	0.0302705
TC08695	Non-cyanogenic ? glucosidase	-3.07262	-3.87351	-3.47307	0.0164753	0.0297618

## Sheet: SD-combined
Supplementary file S3. List of differentially expressed genes involved in cell wall modification in SD-combined stress treatment
		Fold change value
Gene ID	Gene name	Rep1	Rep 2	Average	p-value	FDR
TC03773	Pectinesterase inhibitor 7	1.26427	0.992265	1.12827	0.0310891	0.0414046
TC22250	Laccase 7	5.30856	5.34251	5.32553	0.00215915	0.0318542
TC26965	Laccase 17	1.83748	2.56392	2.2007	0.0338238	0.0414046
TC03830	HXXXD-type acyl-transferase	1.84213	1.79643	1.81928	0.0365406	0.0427693
TC02511	Caffeic acid o-methyltransferase	1.87008	1.76714	1.81861	0.00315235	0.0318542
TC14199	Chalcone synthase 1	1.6299	1.87656	1.75323	0.0340242	0.0414046
TC11297	Cinnamyl-alcohol dehydrogenase	1.227	1.0646	1.1458	0.00548859	0.0323726
TC17224	Beta glucosidase 12	7.0989	6.72333	6.91112	0.0207671	0.0407354
TC10436	Glucosyltransferase, UGT72E1	4.98487	3.6472	4.31604	0.0321455	0.0414046
TC04219	Beta glucosidase 41	2.23635	3.16632	2.70134	0.0327779	0.0414046
TC29127	Expansin-like	0.931892	1.34695	1.13942	0.036899	0.0427693
TC09139	Cationic peroxidase	1.19815	0.925268	1.06171	0.0260021	0.0414046
TC16770	Trichome birefringence-like 19	0.971283	1.12569	1.04849	0.0266609	0.0414046
TC24990	Callose synthase 5	1.84676	2.27256	2.05966	0.0141029	0.0377786
TC06131	Cytochrome p450 81E2	3.39082	2.22081	2.80581	0.0494546	0.0494546
TC07451	Cytochrome p450 81E8	2.15333	1.65626	1.9048	0.0203237	0.0407354
TC34283	Xyloglucan hydrolases, XTH	-1.84529	-1.43595	-1.64062	0.0387832	0.0429988
TC24023	Pectinesterase inhibitor PPE8b-like	-1.40506	-1.93025	-1.66766	0.0245326	0.0414046
TC23862	Pectinesterase inhibitor 12	-2.07487	-1.85311	-1.96399	0.02649	0.0414046
TC16715	Pectinesterase inhibitor 25	-3.09641	-2.45846	-2.77743	0.0314077	0.0414046
TC17867	Chalcone-flavanone isomerase	-1.41313	-1.40872	-1.41092	0.00374755	0.0318542
TC20949	Cinnamate-4-hydroxylase, C4H	-1.29608	-1.85239	-1.57423	0.0384816	0.0429988
TC17749	Phenylalanine ammonia-lyase 1	-1.68325	-2.25923	-1.97124	0.024979	0.0414046
TC12048	Chalcone synthase 1b	-3.86608	-4.32265	-4.09437	0.00761709	0.0323726
TC16782	Lignin biosynthetic peroxidase	-4.13291	-4.22432	-4.17861	0.000129908	0.00662531
TC16740	4-coumarate:coa ligase, 4CL	-4.88259	-6.01291	-5.44775	0.0121579	0.0377786
TC02819	Glucan endo-1,3-beta-glucosidase A6	-1.04818	-1.0261	-1.03714	0.0060784	0.0323726
TC05832	Glucosyltransferase, UGT73C6	-1.00072	-1.0884	-1.04456	0.017101	0.0379196
TC34251	Beta-glucosidase 2	-0.978798	-1.1419	-1.06035	0.0148151	0.0377786
TC04904	Phenylcoumaran benzylic ether reductase	-1.27006	-0.964056	-1.11706	0.0307836	0.0414046
TC09355	Exostosin family protein	-1.24626	-1.00443	-1.12535	0.0145701	0.0377786
TC11733	Geranyl pyrophosphate synthase 6	-0.968848	-1.33265	-1.15075	0.0465025	0.0484005
TC14875	UDP-arabinose 4-epimerase, MURUS 4	-0.998958	-1.31016	-1.15456	0.0336157	0.0414046
TC24635	UDP-glucosyl transferase 89A2	-1.13053	-1.19281	-1.16167	0.0340979	0.0414046
TC14767	Reversibly glycosylated polypeptide 1	-1.2659	-1.38895	-1.32743	0.00747158	0.0323726
TC09686	Glycosyltransferase family 64	-1.16563	-1.80571	-1.48567	0.0493029	0.0494546
TC06673	Powdery mildew resistant 5	-1.47667	-1.63711	-1.55689	0.0206808	0.0407354
TC29314	Glucan endo-1,3-beta-glucosidase	-1.79015	-1.41619	-1.60317	0.0135603	0.0377786
TC32991	O-fucosyltransferase	-1.79109	-1.53892	-1.66501	0.00646336	0.0323726
TC16288	UDP-glucosyl transferase 89B1	-1.77249	-2.72889	-2.25069	0.0427625	0.0454351
TC16233	Glycosyltransferase, UGT72B1	-2.61454	-2.45023	-2.53239	0.00754806	0.0323726
TC14121	O-acyltransferase, WSD1-like	-2.48403	-2.83382	-2.65892	0.0426664	0.0454351
TC18397	Cationic peroxidase 2-like	-3.1015	-2.82885	-2.96517	0.00298919	0.0318542
TC27902	Isoflavone reductase	-3.64883	-3.42118	-3.535	0.0226231	0.0414046
TC10288	Peroxidase 5-like	-3.9567	-3.28144	-3.61907	0.0163436	0.0378875
TC12349	Horseradish peroxidase-like	-3.64902	-3.77649	-3.71276	0.012321	0.0377786
TC18683	Peroxidase p7-like	-4.44308	-3.81987	-4.13147	0.0326634	0.0414046
TC12808	Anthocyanidin glucosyltransferase	-1.12	-1.36848	-1.24424	0.0146032	0.0377786
TC03634	Cytochrome p450 82C4	-1.78575	-1.64449	-1.71512	0.00206769	0.0318542
TC05660	Taxadien alpha acetyltransferase	-1.59682	-2.05933	-1.82808	0.0160773	0.0378875
TC19273	Isoflavone 2'-hydroxylase-like	-3.43481	-2.79553	-3.11517	0.0134663	0.0377786

## Sheet: LD-pathogen
Supplementary file S3. List of differentially expressed genes involved in cell wall modification in LD-pathogen stress treatment
		Fold change value
Gene ID	Gene name	Rep1	Rep 2	Average	p-value	FDR
TC03850	XTH-related, XTR6	2.15379	1.85785	2.00582	0.022743	0.0406979
TC03997	Xylosyltransferase like activity	1.05903	1.05417	1.0566	0.0112898	0.0325649
TC22250	Laccase 7	7.44655	5.01374	6.23015	0.0374785	0.0460017
TC26965	Laccase 17	2.38327	2.63081	2.50704	0.00877725	0.0325649
TC11297	Cinnamyl-alcohol dehydrogenase	1.38685	1.3264	1.35663	0.000860127	0.0146222
TC20649	Alpha 1,4-glycosyltransferase	0.958802	1.26752	1.11316	0.0390507	0.0460017
TC13276	Alpha-glucosidase I enzyme	1.17904	0.87425	1.02665	0.0218416	0.0406979
TC08695	Beta glucosidase 13	4.31843	3.11919	3.71881	0.0259299	0.0419817
TC29413	Cell wall invertase 4	3.80556	2.59014	3.19785	0.0355529	0.0460017
TC16998	X8-GPI family protein	2.13166	1.75417	1.94291	0.0427906	0.0460017
TC00772	Beta-xylosidase 2	1.36828	1.85597	1.61212	0.0494593	0.0494593
TC11473	Glycosyl hydrolase family 35	1.43213	1.37197	1.40205	0.00765035	0.032514
TC29127	Expansin-like	1.3449	1.30881	1.32686	0.00448592	0.0269281
TC27802	UDP-glucosyl transferase 73C2	3.78291	3.75595	3.76943	0.000307249	0.0104465
TC00318	Tigloyltransferase-like	2.98053	4.18144	3.58098	0.0305888	0.0433342
TC08406	UDP-glucose: IAA glucosyltransferase	1.2304	0.990439	1.11042	0.0419344	0.0460017
TC31324	Anthranilate benzoyltransferase	1.25942	0.931646	1.09553	0.025198	0.0419817
TC16782	Lignin biosynthetic peroxidase	-2.71824	-2.32949	-2.52387	0.00590675	0.0286899
TC34283	Xyloglucan hydrolase, XTH 9	-1.27606	-1.22632	-1.25119	0.041654	0.0460017
TC02297	Laccase 4	-1.20264	-1.06443	-1.13354	0.0480083	0.0494593
TC17749	Phenylalanine ammonia-lyase 1	-1.82969	-1.42104	-1.62537	0.0218368	0.0406979
TC20949	Cinnamate-4-hydroxylase, C4H	-1.77743	-1.585	-1.68122	0.0114935	0.0325649
TC12048	Chalcone synthase 1B	-2.04297	-1.71396	-1.87846	0.0282607	0.0426003
TC02064	Exostosin family protein	-1.25478	-0.976704	-1.11574	0.0177374	0.0402047
TC14767	Glucan-protein synthase	-1.56793	-1.55741	-1.56267	0.00389078	0.0269281
TC18397	Cationic peroxidase 2-like	-1.28804	-1.27482	-1.28143	0.00475202	0.0269281
TC34251	Beta-glucosidase 2	-1.54633	-1.25415	-1.40024	0.0157987	0.0383684
TC16233	Glycosyltransferase, UGT72B1	-1.69364	-1.35925	-1.52644	0.0288179	0.0426003
TC12131	Beta-glucosidase-like A6	-1.87141	-1.32246	-1.59693	0.0432958	0.0460017
TC10288	Peroxidase 5	-2.95037	-2.7481	-2.84924	0.0139499	0.0364843
TC18683	Peroxidase P7 like	-3.53419	-3.33825	-3.43622	0.039727	0.0460017
TC05660	Taxadien-O-acetyltransferase	-1.01146	-1.22234	-1.1169	0.0100208	0.0325649
TC10879	Cytochrome P450 81D	-0.996125	-1.08327	-1.0397	0.00198954	0.0225481
TC13742	Uclacyanin	-3.30785	-3.11137	-3.20961	0.0212385	0.0406979

## Sheet: LD-drought
Supplementary file S3. List of differentially expressed genes involved in cell wall modification in LD-drought stress treatment
		Fold change value
Gene ID	Gene name	Rep1	Rep 2	Average	p-value	FDR
TC12200	PARVUS	3.65051	3.42319	3.53685	0.00535415	0.0306598
TC14672	Chalcone and stilbene synthase	1.32162	1.23137	1.2765	0.0243974	0.0451803
TC04317	UDP-Glycosyltransferase 91H8	3.11594	2.75131	2.93362	0.00551877	0.0306598
TC00954	UDP rhamnosyltransferase 1	2.47547	2.49258	2.48402	0.0101975	0.0392212
TC11355	Pectin lyase-like 5	1.95045	2.2154	2.08292	0.0240854	0.0451803
TC09888	Membrane bound acyl transferase	2.00653	1.57123	1.78888	0.0189591	0.0451803
TC03976	Beta-galactosidase 16	1.84099	1.65864	1.74982	0.0372822	0.0491521
TC32587	Membrane related protein CP5	2.01367	1.4202	1.71694	0.0432008	0.0493455
TC16836	Plant CW/I invertases	1.55323	1.09084	1.32203	0.0326674	0.0491521
TC03972	Beta-galactosidase 3 like	1.0613	1.3915	1.2264	0.0178692	0.0451803
TC31366	Extensin 3	0.859019	1.24186	1.05044	0.0351656	0.0491521
TC00497	Callose synthase 7	1.50734	1.29446	1.4009	0.0188559	0.0451803
TC00917	Callose synthase 3	1.28494	1.25268	1.26881	0.0303189	0.0491521
TC10740	UDP-glucosyl transferase 85J2	2.90301	2.58751	2.74526	0.0363741	0.0491521
TC07804	Leucoanthocyanidin dioxygenase	1.35392	1.05325	1.20359	0.0154476	0.0451803
TC11483	XTH-related, XTR4	-2.26755	-1.52404	-1.8958	0.0364299	0.0491521
TC34537	Pectin acetylesterase 8-like	-3.03504	-2.5755	-2.80527	0.0208123	0.0451803
TC11205	Cinnamoyl CoA reductase 1	-0.972971	-1.33485	-1.15391	0.0434241	0.0493455
TC18021	Chalcone--flavonone isomerase	-1.18116	-1.33718	-1.25917	0.0232387	0.0451803
TC03010	Phenylalanine ammonia-lyase 2	-1.9787	-2.04555	-2.01213	0.00165461	0.0278425
TC20949	Cinnamate-4-hydroxylase, C4H	-2.59481	-1.6811	-2.13796	0.0458043	0.0498576
TC11904	Phenylalanine ammonia-lyase 3	-2.38071	-2.62845	-2.50458	0.03543	0.0491521
TC00725	Phenylalanine ammonia-lyase 1	-2.06777	-3.14262	-2.60519	0.0427025	0.0493455
TC33764	Chalcone synthase	-2.63507	-3.87148	-3.25327	0.0388353	0.0493455
TC16562	4-coumarate:CoA ligase, 4CL	-3.66939	-3.28475	-3.47707	0.00389795	0.0278425
TC03006	Cellulose synthase, CSLD5	-1.33753	-1.32132	-1.32943	0.0132256	0.0451803
TC01766	Exostosin family protein	-1.00403	-1.02279	-1.01341	0.0288243	0.0491521
TC11473	Beta-galactosidase 35	-1.09801	-1.12596	-1.11199	0.0346149	0.0491521
TC06300	Trichome birefringence-like 43	-1.15214	-1.22507	-1.18861	0.0145212	0.0451803
TC10249	Glycosyltransferase, UGT72L5	-1.15942	-1.32662	-1.24302	0.026502	0.0473251
TC09139	Cationic peroxidase 1-like	-1.48846	-1.1761	-1.33228	0.0373556	0.0491521
TC07203	Galacturonosyltransferase 14	-1.38482	-1.29621	-1.34051	0.00212952	0.0278425
TC03120	Trichome birefringence-like 10	-1.46695	-1.46132	-1.46414	0.00925404	0.0385585
TC14872	Polygalacturonase like	-1.86713	-1.68988	-1.77851	0.0422182	0.0493455
TC13656	Peroxidase 21	-1.80673	-1.79574	-1.80124	3.74763e-05	0.00187382
TC06673	Trichome birefringence-like 44	-1.93494	-1.7945	-1.86472	0.0199199	0.0451803
TC02780	Beta glucosidase 12	-1.87841	-1.89133	-1.88487	0.00337688	0.0278425
TC05819	Glycosyltransferase, UGT72B1	-2.05885	-1.76782	-1.91334	0.0159159	0.0451803
TC23134	Pinoresinol reductase	-2.40503	-1.51368	-1.95935	0.0492968	0.0498576
TC07554	UDP-glucosyl transferase 708B1	-2.22419	-1.94305	-2.08362	0.0478207	0.0498576
TC03128	Polygalacturonase inhibiter	-2.5304	-1.66165	-2.09603	0.0489553	0.0498576
TC09999	Expansin-like B1	-2.14196	-2.13879	-2.14038	0.0230233	0.0451803
TC01094	UDP-glucosyl transferase 88E11	-3.36047	-2.68121	-3.02084	0.0463849	0.0498576
TC10893	Leucine-rich repeat receptor, FEI1	-3.36099	-3.02191	-3.19145	0.00361312	0.0278425
TC14628	Trichome birefringence-like 19	-4.36814	-3.96903	-4.16858	0.00285846	0.0278425
TC09202	Anthocyanidin malonyltransferase	-1.98113	-1.23863	-1.60988	0.0498576	0.0498576
TC03928	UDP-glucosyl transferase 85A5	-1.99609	-2.27419	-2.13514	0.00833512	0.0378869
TC07559	Flavonoid 3'-hydroxylase	-2.09622	-2.47446	-2.28534	0.00693437	0.0346719
TC06688	Flavonol glucosyltransferase	-2.54863	-2.27644	-2.41253	0.0208486	0.0451803
TC15207	Isoflavone reductase	-2.65167	-2.23869	-2.44518	0.0428611	0.0493455

## Sheet: LD-combined
Supplementary file S3. List of differentially expressed genes involved in cell wall modification in LD-combined stress treatment
		Fold change value
Gene ID	Gene name	Rep1	Rep 2	Average	p-value	FDR
TC06128	Glycogenin-like starch initiation 3	1.40014	1.03228	1.21621	0.0245	0.0378946
TC15371	Cinnamoyl CoA reductase 1	4.43951	4.20669	4.3231	0.0127301	0.0307923
TC26965	Laccase	2.64189	3.28351	2.9627	0.0159583	0.0329804
TC03180	Cellulose synthase A7	6.27923	5.71184	5.99554	0.00239674	0.0275302
TC32736	COBRA-Like protein 6	5.33183	4.80586	5.06884	0.0104015	0.0286621
TC33182	Cellulose synthase A8	4.10039	2.83549	3.46794	0.039969	0.0426748
TC18296	Arabinogalactan, FLA12	5.23204	4.19804	4.71504	0.0267546	0.0378946
TC29136	Peroxidase P7	2.67332	3.69478	3.18405	0.0296607	0.0378946
TC16770	Trichome birefringence-like 19	1.35318	1.66179	1.50749	0.0206301	0.0378946
TC13540	Methylecgonone reductase-like	0.86076	1.16144	1.0111	0.0347102	0.0396863
TC00916	Callose synthase	1.49192	1.66049	1.5762	0.027817	0.0378946
TC02511	Reticuline methyltransferase-like	3.8073	3.54998	3.67864	0.00179671	0.0275302
TC05671	Terpenoid cyclase	2.51024	2.22061	2.36542	0.0299175	0.0378946
TC30554	Camelliol C synthase 1	1.36114	1.55595	1.45854	0.0177609	0.0355219
TC15369	Fe(II)/ascorbate oxidase	1.24413	1.36126	1.3027	0.00404581	0.0275302
TC23862	Pectin methylesterase inhibitor 12	-1.69423	-1.9844	-1.83932	0.03239	0.0393761
TC12236	Pectin methylesterase inhibitor	-1.7101	-2.11297	-1.91154	0.0274313	0.0378946
TC08326	Pectinacetylesterase 8 like	-1.76232	-2.30946	-2.03589	0.0221039	0.0378946
TC08586	Pectinacetylesterase	-2.24161	-2.35002	-2.29581	0.0406099	0.0426748
TC16715	Pectinesterase inhibitor 25	-3.92182	-3.22469	-3.57325	0.0134058	0.0307923
TC14751	XTH-related, XTR23	-5.00033	-5.93439	-5.46736	0.0257764	0.0378946
TC17867	Chalcone-flavanone isomerase 3	-1.33629	-1.00402	-1.17016	0.045173	0.0459136
TC17749	Phenylalanine ammonia-lyase 1	-1.60479	-1.77478	-1.68978	0.00867936	0.0283221
TC20949	Cinnamate-4-hydroxylase, C4H	-2.17853	-1.68399	-1.93126	0.0220242	0.0378946
TC05545	Chalcone synthase	-2.58343	-2.39404	-2.48874	0.00191965	0.0275302
TC12048	Chalcone synthase 1B	-4.18067	-3.58914	-3.8849	0.0107262	0.0286621
TC01394	Chalcone reductase	-4.42288	-3.85428	-4.13858	0.0049354	0.0275302
TC16740	4-coumarate:coa ligase 1 like, 4CL	-4.66575	-5.67244	-5.16909	0.011095	0.0286621
TC16782	Lignin biosynthetic peroxidase	-5.23259	-5.69061	-5.4616	0.00183438	0.0275302
TC07044	Chalcone--flavonone isomerase 1B-2-like	-6.63111	-7.12956	-6.88034	0.00999977	0.0286621
TC03158	Cellulose synthase, CSLD3	-3.13829	-3.93689	-3.53759	0.0322629	0.0393761
TC32103	Exostosin family protein	-0.978386	-1.05595	-1.01717	0.00459423	0.0275302
TC30643	Lariat debranching enzyme	-1.71748	-1.53313	-1.62531	0.00360941	0.0275302
TC16225	Peroxidase 15 like	-2.07292	-1.82474	-1.94883	0.029949	0.0378946
TC25726	Isoliquiritigenin methyltransferase-like	-1.82683	-2.52374	-2.17529	0.0358457	0.0396863
TC12304	Arabinogalactan, FLA9	-2.65077	-2.08986	-2.37032	0.0336765	0.0396863
TC16233	Glycosyltransferase, UGT72B17	-2.53427	-2.49648	-2.51538	0.00666054	0.0275302
TC08462	Leucine-rich repeat extensin, LRX	-2.84193	-2.2903	-2.56612	0.0478002	0.0478002
TC12349	Horseradish peroxidase-like	-2.58885	-2.58175	-2.5853	0.0243622	0.0378946
TC12021	Peroxidase 43	-2.75032	-2.51417	-2.63224	0.0339993	0.0396863
TC10288	Peroxidase 5-like	-3.1779	-2.5629	-2.8704	0.0234234	0.0378946
TC03129	Polygalacturonase inhibitor	-3.12637	-2.84481	-2.98559	0.00538731	0.0275302
TC23779	Beta glucosidase 12	-3.78964	-3.2185	-3.50407	0.0065821	0.0275302
TC26655	Cell wall invertase 4	-3.50967	-3.75852	-3.63409	0.00191278	0.0275302
TC28746	Phenylcoumaran benzylic ether reductase	-3.26813	-4.2252	-3.74667	0.0413278	0.0427054
TC32746	Glycosyltransferase, UGT72Z1	-4.12124	-3.58269	-3.85196	0.0186802	0.0361928
TC09055	Beta-xylosidase 2	-3.66531	-4.29142	-3.97836	0.00865861	0.0283221
TC11637	Beta-glucosidase	-4.49478	-3.87744	-4.18611	0.0157593	0.0329804
TC18397	Cationic peroxidase 2-like	-4.10892	-5.00929	-4.5591	0.00997498	0.0286621
TC18683	Peroxidase P7 like	-4.98281	-4.37417	-4.67849	0.0247436	0.0378946
TC04262	Beta glucosidase 15	-4.1451	-5.30385	-4.72448	0.0247292	0.0378946
TC11205	Tetraketide alpha-pyrone reductase 2	-1.12585	-0.919543	-1.0227	0.0358215	0.0396863
TC03634	Cytochrome P450 82C4	-1.85215	-1.24183	-1.54699	0.0371938	0.0404564
TC26375	UDP-glycosyltransferase 73C3-like	-1.80652	-1.67245	-1.73948	0.00532689	0.0275302
TC11469	Cytochrome P450 82D47	-2.21898	-2.48213	-2.35056	0.00319315	0.0275302
TC07451	Cytochrome P450 81E8	-1.98548	-2.79748	-2.39148	0.0299204	0.0378946
TC28169	Glucosinolate S-oxygenase	-2.44306	-2.73532	-2.58919	0.00714232	0.0276765
TC06131	Isoflavone 2'-hydroxylase-like	-2.55409	-2.88217	-2.71813	0.0139062	0.0307923
TC13742	Uclacyanin	-3.4989	-2.9309	-3.2149	0.0275509	0.0378946
TC23040	Cytochrome P450 81E4	-3.35506	-3.61355	-3.4843	0.0136117	0.0307923
TC15574	Isoflavone reductase	-3.88313	-4.44805	-4.16559	0.00859851	0.0283221
TC15172	Isoflavone-methyltransferase 9	-4.50838	-4.21093	-4.35965	0.00592124	0.0275302
